# Supplementary material for: A Novel in Duck Myoblasts: The Transcription Factor Retinoid X Receptor Alpha (RXRA) Inhibits Lipid Accumulation by Promoting CD36 Expression
Source: MDPI journal article supplement (doi:10.3390/ijms24021180), 2023-01-07
Supplement: s1 [file s1]

**Table S1.** List of the primer sequences used for RT-PCR.

| Genes  |   | Primer sequences (5'-3') | Product/bp | Tm/°C |
|--------|---|--------------------------|------------|-------|
| RXRA   | F | TGCGGAAGGACCTGACCTACAC   | 178        | 60    |
|        | R | GACTCCACCTCGTTCTCGTTGC   |            |       |
| CD36   | F | GCTTGTGCCAGGAAGCTCAGTT   | 268        | 60    |
|        | R | AGCAACAACAGCGAGGTTTCAGG  |            |       |
| ACSL1  | F | CGTTACTCCACCGAGGCTTCAA   | 115        | 60    |
|        | R | TCATAGAGCGGCACCACTACCA   |            |       |
| ELOVL6 | F | CAGTCAGTGTGCGACCAGAGTT   | 226        | 60    |
|        | R | CCAGCCACCATGTCCTTGTAGG   |            |       |
| FABPA  | F | GCTGGGTGTGGGATTTGCTA     | 168        | 60    |
|        | R | CTGTCATCTGCTGTGGTCTCA    |            |       |
| PPARG  | F | GCCACAAGCGGAGAAGGAGAAG   | 186        | 60    |
|        | R | GCAGCGGTGACACATGCTTACA   |            |       |
| GAPDH  | F | GGAGAAACCAGCCAAGTAT      | 177        | 60    |
|        | R | CCATTGAAGTCACAGGAGA      |            |       |
