# Supplementary material for: A Novel in Duck Myoblasts: The Transcription Factor Retinoid X Receptor Alpha (RXRA) Inhibits Lipid Accumulation by Promoting CD36 Expression
Source: MDPI journal article supplement (doi:10.3390/ijms24021180), 2023-01-07
Supplement: s1 [file s1]

**Table S2.** Sequences of the primers for gene coding region amplification.

| Genes       |   | Primer sequences (5' - 3')            | Restriction site          | Product/bp | Tm/°C |
|-------------|---|---------------------------------------|---------------------------|------------|-------|
| <i>RXRA</i> | F | <u>GCTAGC</u> ATGGACACCAAACACTTCCTG   | NheI ( <u>GCTAGC</u> )    | 1416       | 68    |
|             | R | <u>AAGCTT</u> CTAAGTCATTTGATGGGGCG    | HindIII ( <u>AAGCTT</u> ) |            |       |
| <i>CD36</i> | F | <u>GGATCC</u> ATGGGCTGTAACCGAAACT     | BamHI ( <u>GGATCC</u> )   | 1428       | 62.5  |
|             | R | <u>GCTAGC</u> TTATTTTAATTTCTTTGATCTGC | NheI ( <u>GCTAGC</u> )    |            |       |
