# Supplementary material for: A Novel in Duck Myoblasts: The Transcription Factor Retinoid X Receptor Alpha (RXRA) Inhibits Lipid Accumulation by Promoting CD36 Expression
Source: MDPI journal article supplement (doi:10.3390/ijms24021180), 2023-01-07
Supplement: s1 [file s1]

**Table S3.** List of shRNA sequences.

| Name        | Sequence (5'-3')                                            |
|-------------|-------------------------------------------------------------|
| RXRA-shRNA1 | CCGGGGACAGGTCTTCAGGTAAACACTCGAGTGTTTACCTGAAGACCTGTCCTTTTTG  |
| RXRA-shRNA2 | CCGGGCGTACTGCAAGCACAAATACCTCGAGGTATTTGTGCTTGCAGTACGCTTTTTG  |
| RXRA-shRNA3 | CCGGGCTCCACATTGCTGTAAATCCTCGAGGATTTACAGCAATGTGGGAGCTTTTTG   |
| RXRA-shRNA4 | CCGGGGATTTCAGGTCGTAACCTTTGCTCGAGCAAAGTTACGACCTGAAATCCTTTTTG |
| CD36-shRNA1 | CCGGGGACAGGTCTTCAGGTAAACACTCGAGTGTTTACCTGAAGACCTGTCCTTTTTG  |
| CD36-shRNA2 | CCGGGCGTACTGCAAGCACAAATACCTCGAGGTATTTGTGCTTGCAGTACGCTTTTTG  |
| CD36-shRNA3 | CCGGGCTCCACATTGCTGTAAATCCTCGAGGATTTACAGCAATGTGGGAGCTTTTTG   |
| CD36-shRNA4 | CCGGGGATTTCAGGTCGTAACCTTTGCTCGAGCAAAGTTACGACCTGAAATCCTTTTTG |
